# Supplementary material
Source: publisher site journal article supplement (https://www.dovepress.com/get_supplementary_file.php?f=469877.docx)
Supplement: Supplementary file 1 [file get_supplementary_file.php]

|  | Min. | 1stQu. | Median | Mean | 3rdQu. | Max. |
| --- | --- | --- | --- | --- | --- | --- |
| CART | 0.938 | 0.948 | 0.959 | 0.955 | 0.960 | 0.969 |
| LDA | 0.938 | 0.948 | 0.959 | 0.953 | 0.959 | 0.960 |
| SVM | 0.928 | 0.938 | 0.949 | 0.947 | 0.959 | 0.960 |
| KNN | 0.629 | 0.684 | 0.687 | 0.683 | 0.704 | 0.711 |
| RF | 0.938 | 0.948 | 0.949 | 0.951 | 0.959 | 0.960 |
| ANN | 0.592 | 0.598 | 0.938 | 0.809 | 0.949 | 0.970 |

**Table S1** Accuracy results of different models, using 5 runs for each classifier.

The accuracy values are summarized using minimum (Min), first quartile (1stQu), median, mean, third quartile (3rdQu), and maximum (Max) values. 5-fold cross-validation is used for these experiments.

**Table S2** p-value adjustment using Bonferroni method. The upper diagonal estimates the differences in accuracy between the classifiers. The lower diagonal depicts the p-values associated with the null hypothesis.

|  | CART | LDA | SVM | KNN | RF | ANN |
| --- | --- | --- | --- | --- | --- | --- |
| CART | -- | 0.002 | 0.008 | 0.272 | 0.004 | 0.146 |
| LDA | 1 | -- | 0.006 | 0.270 | 0.002 | 0.144 |
| SVM | 1 | 1 | -- | 0.264 | -0.004 | 0.137 |
| KNN | 0.0003 | 0.0003 | 0.0011 | -- | -0.268 | -0.126 |
| RF | 1 | 1 | 1 | 0.0005 | -- | 0.142 |
| ANN | 1 | 1 | 1 | 1 | 1 | -- |

The p-values have been modified using the Bonferroni method. The table upper diagonal displays the estimated differences in accuracy between the classifiers. The lower diagonal depicts the p-values associated with the null hypothesis (H0), which states that the difference in accuracy is equal to zero, i.e., there is no difference in accuracy among the different classifiers used.
